# Supplementary material for: In Vitro Newly Isolated Environmental Phage Activity against Biofilms Preformed by Pseudomonas aeruginosa from Patients with Cystic Fibrosis
Source: Microorganisms. 2021 Feb 25;9(3):478. doi: 10.3390/microorganisms9030478 (PMC7996588; doi:10.3390/microorganisms9030478)

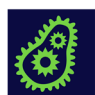

# Supplementary Materials: In vitro Newly Isolated Environmental Phage Activity against Biofilms Preformed by *Pseudomonas aeruginosa* from Patients with Cystic Fibrosis

Ersilia Vita Fiscarelli <sup>1,†</sup>, Martina Rossitto <sup>1,†</sup>, Paola Rosati <sup>2,\*</sup>, Nour Essa <sup>1</sup>, Valentina Crocetta <sup>3</sup>, Andrea Di Giulio <sup>4</sup>, Veronica Lupetti <sup>3</sup>, Giovanni Di Bonaventura <sup>3,‡</sup> and Arianna Pompilio <sup>3,‡</sup>

**Table S1.** The 22 newly isolated bacteriophages (phages) from five environmental sewage sources near Rome and in Rome, including Bambino Gesù Children's Hospital (OBG), Italy. Characteristics, titers, and phage cross-activity vs. indicator bacteria (laboratory *Pseudomonas aeruginosa*, PAO1, and six PA isolates from patients with cystic fibrosis, CF, namely MA1-MA6).

| Phages  | Sewage Sources (Five Sources including OBG) | Primary PA Hosts (Laboratory PAO1 and CF PA MA4) | Phage Plaque Morphology |                     |                   | Phage Titers (PFU/mL) <sup>a</sup> | Indicator Bacteria (Laboratory PAO1 and Six CF PA MA1-MA6) Tested for Phage Cross-Activity |
|---------|---------------------------------------------|--------------------------------------------------|-------------------------|---------------------|-------------------|------------------------------------|--------------------------------------------------------------------------------------------|
|         |                                             |                                                  | Size (mm) <sup>b</sup>  | Aspect <sup>c</sup> | Halo <sup>d</sup> |                                    |                                                                                            |
| Φ1_DL1  | Rome                                        | MA4                                              | 3                       | C                   | +                 | 1.0 × 10 <sup>6</sup>              | MA1, MA3, PAO1                                                                             |
| Φ2_DL1  | Rome                                        | MA4                                              | 2                       | C                   | +                 | 2.0 × 10 <sup>6</sup>              | MA1, MA3, PAO1                                                                             |
| Φ3_ZP1  | Farm-house 1                                | MA4                                              | 2                       | C                   | +                 | 3.0 × 10 <sup>6</sup>              | MA1, MA3, PAO1                                                                             |
| Φ4_ZP1  | Farm-house 1                                | MA4                                              | 3                       | T                   | +                 | 5.0 × 10 <sup>7</sup>              | MA1, MA3, MA5, PAO1                                                                        |
| Φ5_ZP1  | Farm-house 1                                | MA4                                              | 1                       | C                   | +                 | 1.0 × 10 <sup>8</sup>              | MA1, MA3, PAO1                                                                             |
| Φ6_ZP2  | Farm-house 2                                | MA4                                              | 3                       | C                   | +                 | 2.0 × 10 <sup>4</sup>              | MA1, MA3, PAO1                                                                             |
| Φ7_ZP2  | Farm-house 2                                | MA4                                              | 3                       | C                   | +                 | 1.2 × 10 <sup>6</sup>              | MA1, MA3, PAO1                                                                             |
| Φ8_ZP2  | Farm-house 2                                | MA4                                              | 2                       | C                   | +                 | 1.5 × 10 <sup>7</sup>              | MA1, MA3, PAO1                                                                             |
| Φ9_ZP2  | Farm-house 2                                | MA4                                              | 1                       | C                   | +                 | 6.0 × 10 <sup>6</sup>              | MA1, MA3, MA6, PAO1                                                                        |
| Φ10_ZP2 | Farm-house 2                                | MA4                                              | 3                       | C                   | +                 | 3.0 × 10 <sup>5</sup>              | MA1, MA3, PAO1                                                                             |
| Φ11_ZP3 | Farm-house 3                                | MA4                                              | 2                       | C                   | +                 | 1.3 × 10 <sup>4</sup>              | MA1, MA3, PAO1                                                                             |
| Φ12_ZP3 | Farm-house 3                                | MA4                                              | 3                       | C                   | +                 | 1.4 × 10 <sup>7</sup>              | MA1, MA3, PAO1                                                                             |

|         |                  |      |   |   |   |                      |                               |
|---------|------------------|------|---|---|---|----------------------|-------------------------------|
| Φ13_OBG | OBG <sup>g</sup> | MA4  | 3 | C | + | $1.1 \times 10^6$    | MA1, MA3,<br>PAO1             |
| Φ14_OBG | OBG              | MA4  | 2 | C | + | $1.0 \times 10^7$    | MA1, MA3,<br>PAO1             |
| Φ15_OBG | OBG              | MA4  | 1 | C | + | $2.0 \times 10^8$    | MA1, MA3,<br>PAO1             |
| Φ16_OBG | OBG              | PAO1 | 5 | T | - | $6.0 \times 10^7$    | MA1, MA2,<br>MA3, MA4,<br>MA5 |
| Φ17_OBG | OBG              | PAO1 | 4 | C | - | $1.3 \times 10^9$    | MA1, MA2,<br>MA3, MA4,<br>MA5 |
| Φ18_OBG | OBG              | PAO1 | 3 | C | - | $1.0 \times 10^{10}$ | MA1, MA2,<br>MA3, MA4,<br>MA5 |
| Φ19_OBG | OBG              | PAO1 | 2 | C | - | $1.1 \times 10^9$    | MA1, MA2,<br>MA3, MA4,<br>MA5 |
| Φ20_OBG | OBG              | PAO1 | 4 | C | - | $1.9 \times 10^9$    | MA1, MA2,<br>MA3, MA4,<br>MA5 |
| Φ21_OBG | OBG              | PAO1 | 2 | C | - | $1.0 \times 10^8$    | MA1, MA2,<br>MA3, MA4,<br>MA5 |
| Φ22_OBG | OBG              | PAO1 | 2 | C | - | $2.0 \times 10^8$    | MA1, MA2,<br>MA3, MA4,<br>MA5 |

<sup>a</sup> PFU/mL = plaque forming units. <sup>b</sup> mm = millimeters. <sup>c</sup> Clear, C; Turbid, T. <sup>d</sup> Absence, - ; presence, +.

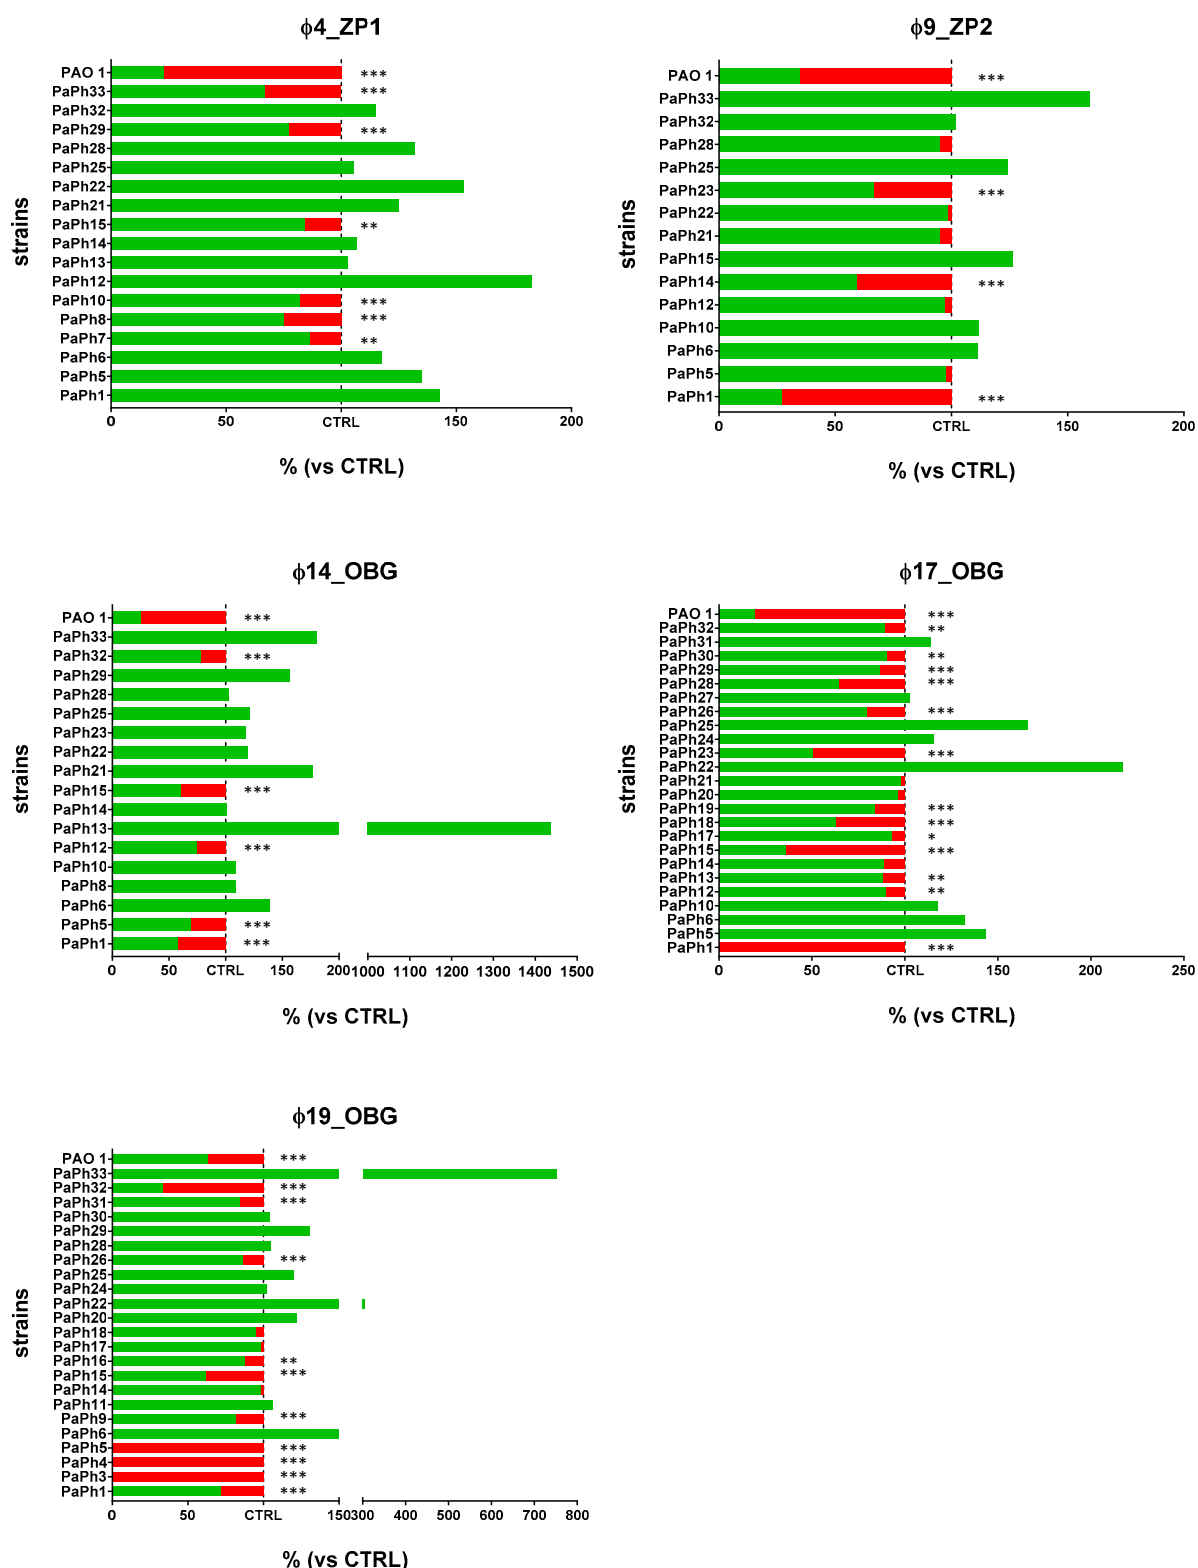

**Figure S1.** *Pseudomonas aeruginosa* (PA) biofilm dispersions evaluated *in vitro* after being exposed for 4-h to the five selected newly isolated environmental phages (Φ4\_ZP1, Φ9\_ZP2, Φ14\_OBG, Φ17\_OBG and Φ19\_OBG) tested against laboratory PA (PAO1) and 33 cystic fibrosis PA 24-h-old biofilms at multiplicity of infection (MOI) 1. Biofilm dispersions evaluated by spectrophotometry in crystal violet stain. Results are shown as percentages (%) dispersed PA biofilms (red) and residual biofilm biomasses (green) when comparing phage exposed and unexposed PA biofilms treated with trypticase soy broth (TSB) control samples (CTRL). The dotted line represents 100% residual biofilms in controls after TSB challenge. The green lines over the dotted line represent PA biofilm biomasses increase when comparing phage exposed and unexposed CTRL PA biofilms. Significant levels \*  $p < 0.05$ , \*\*  $p < 0.01$ , \*\*\*  $p < 0.001$  analyzed by the  $\chi^2$  test.

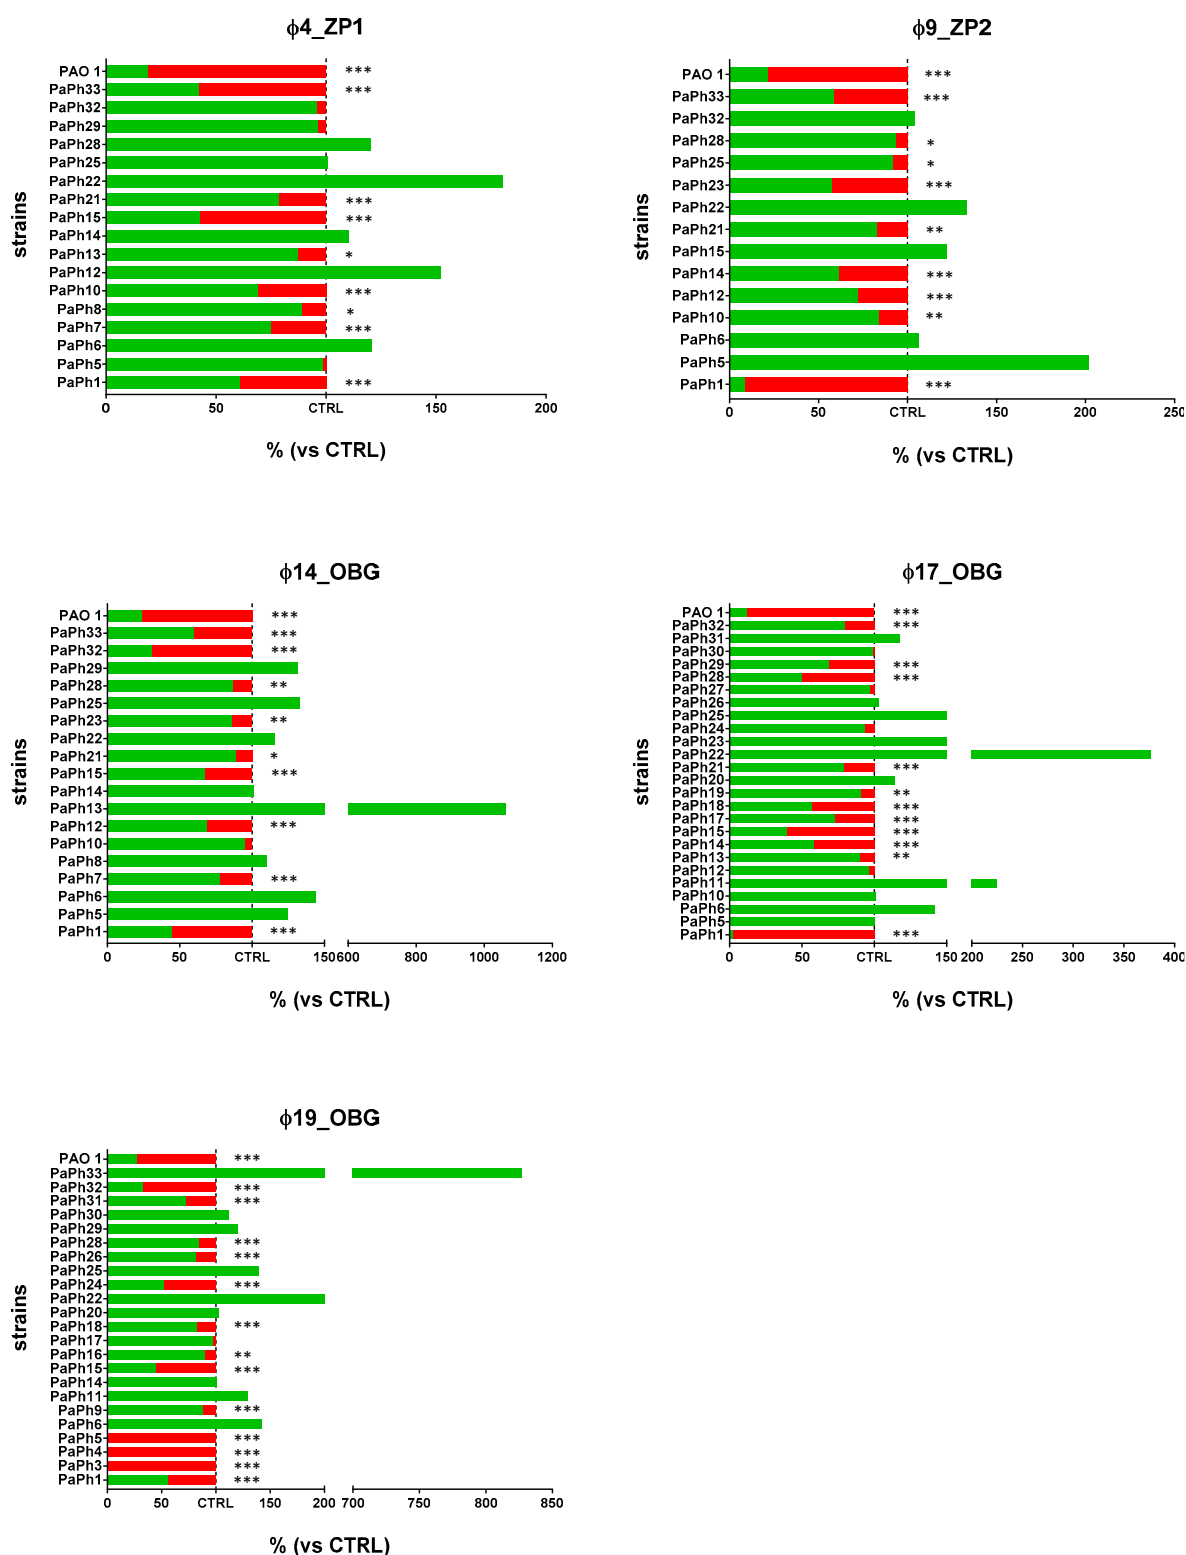

**Figure S2.** *Pseudomonas aeruginosa* (PA) biofilm dispersions evaluated *in vitro* after exposure for 4-h to the five selected newly isolated environmental phages (Φ4\_ZP1, Φ9\_ZP2, Φ14\_OBG, Φ17\_OBG and Φ19\_OBG) tested against laboratory PA (PAO1) and 33 cystic fibrosis PA 24-h-old biofilms at multiplicity of infection (MOI) 100. Biofilm dispersions evaluated by spectrophotometry in crystal violet stain. Results are shown as percentages (%) dispersed PA biofilms (red) and residual biofilm biomasses (green) when comparing phage exposed and unexposed PA biofilms treated with trypticase soy broth (TSB) control samples (CTRL). The dotted line represents 100% residual biofilms in controls after TSB challenge. The green lines over the dotted line represent PA biofilm biomasses increase when comparing phage exposed and unexposed CTRL PA biofilms. Significant levels \*  $p < 0.05$ , \*\*  $p < 0.01$ , \*\*\*  $p < 0.001$  analyzed by the  $\chi^2$  test.

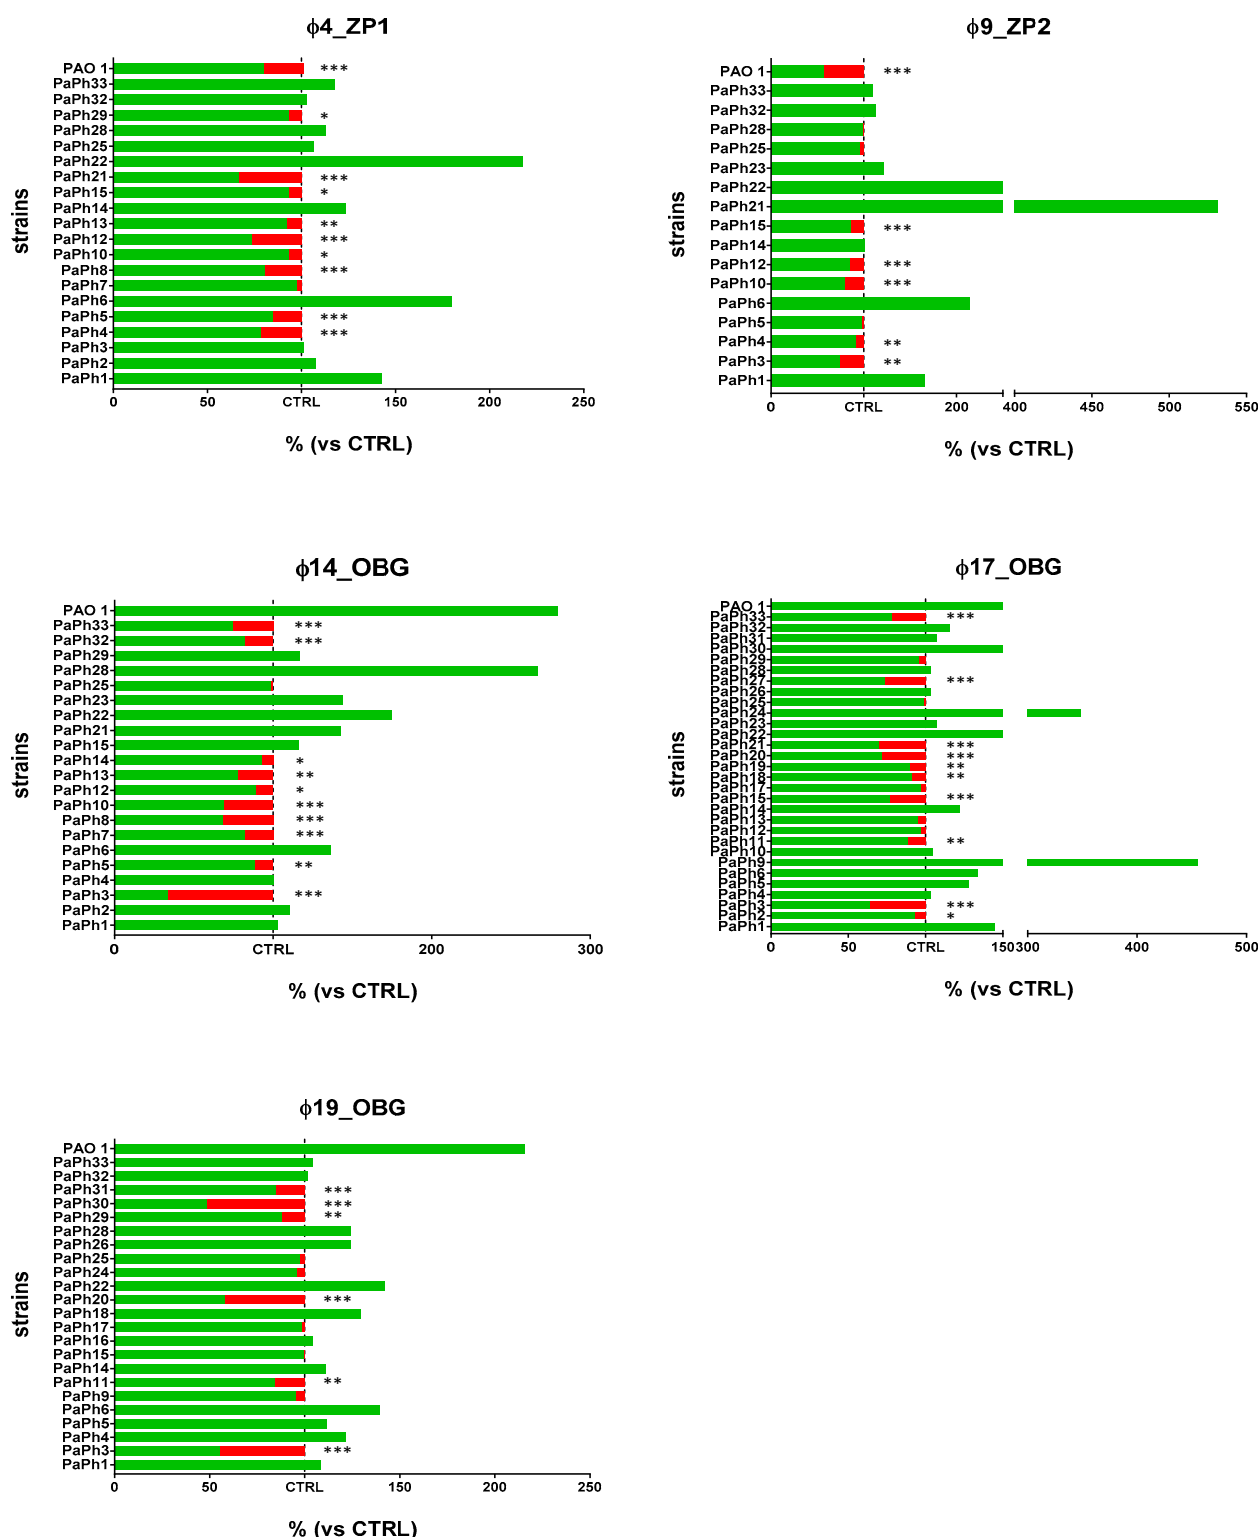

**Figure S3.** *Pseudomonas aeruginosa* (PA) biofilm dispersions evaluated *in vitro* after 24-h exposures to the five newly isolated environmental selected phages (Φ4\_ZP1, Φ9\_ZP2, Φ14\_OBG, Φ17\_OBG and Φ19\_OBG) tested against laboratory PA (PAO1) and 33 cystic fibrosis PA 24-h-old biofilms at multiplicity of infection (MOI) 1. Biofilm dispersions evaluated by spectrophotometry in crystal violet stain. Results are shown as percentages (%) dispersed PA biofilms (red) and residual biofilm biomasses (green) when comparing phage exposed and unexposed PA biofilms treated with trypticase soy broth (TSB) control samples (CTRL). The dotted line represents 100% residual biofilms in controls after TSB challenge. The green lines over the dotted line represent PA biofilm biomasses increase when comparing phage exposed and unexposed CTRL PA biofilms. Significant levels \*  $p < 0.05$ , \*\*  $p < 0.01$ , \*\*\*  $p < 0.001$  analyzed by the  $\chi^2$  test.

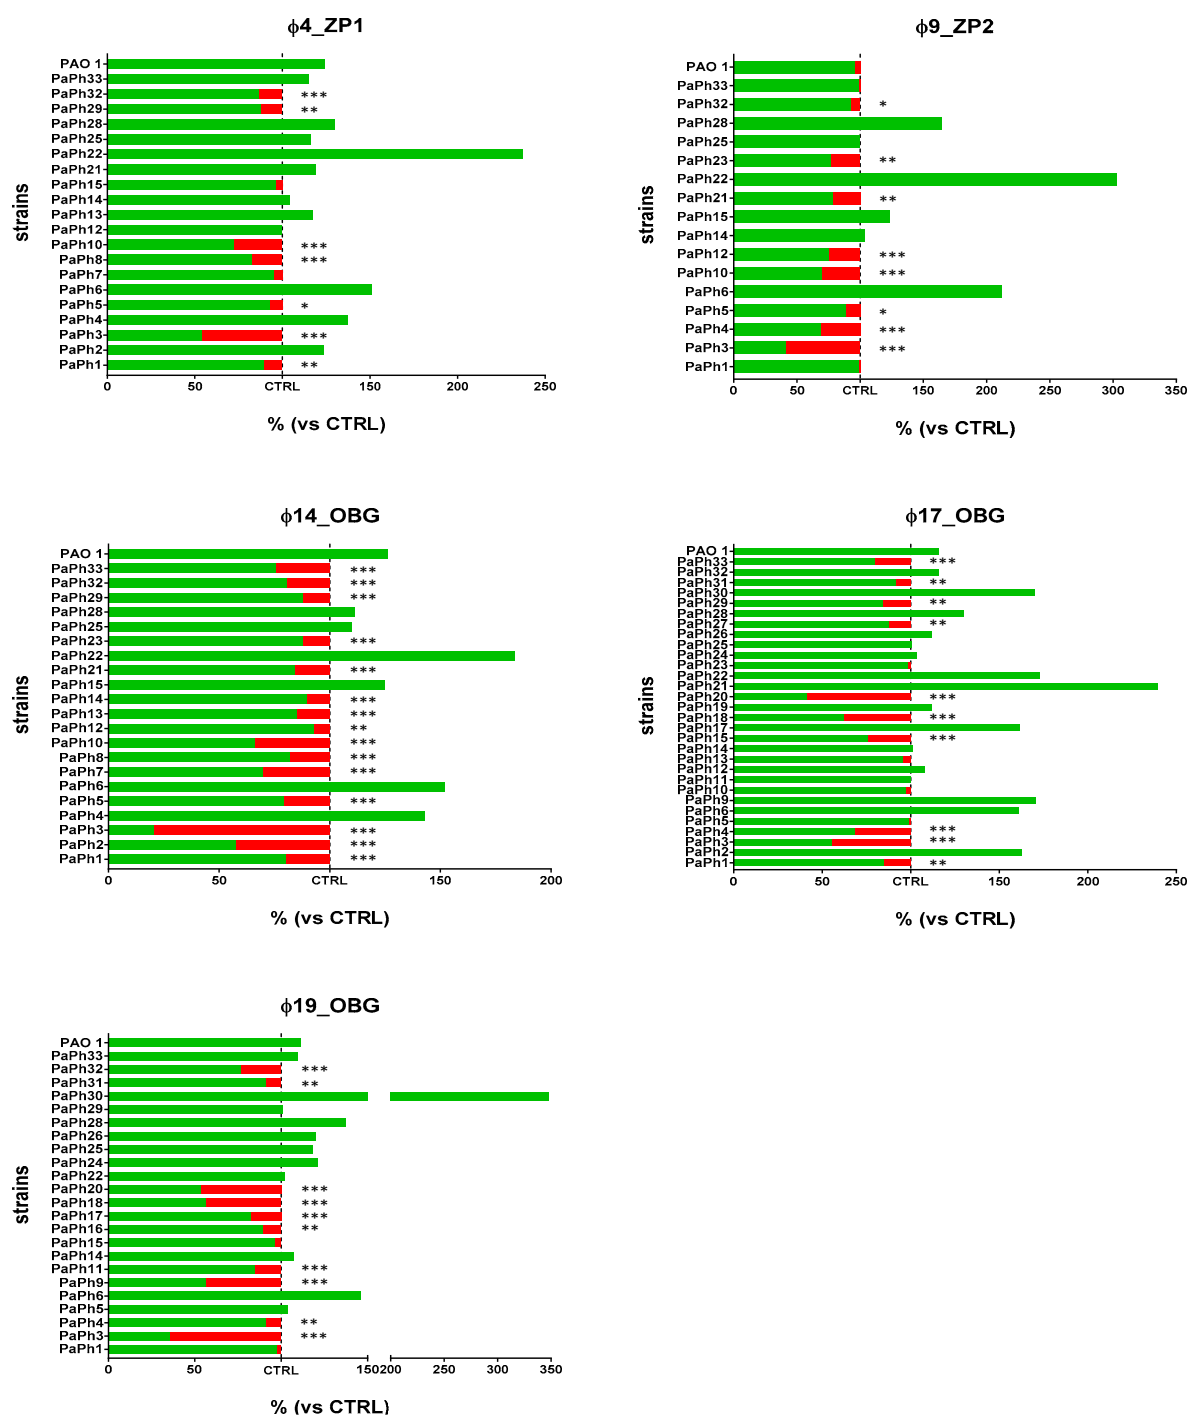

Supplement: Supplementary file 1 [file microorganisms-09-00478-s001.pdf]
